# Supplementary material for: Two-photon fluorescence and MR bio-imaging of endogenous H2O2 in the tumor microenvironment using a dual-mode nanoprobe
Source: Royal Society of Chemistry journal article supplement (doi:10.1039/d1cc01129d), 2021-01-01
Supplement: d1cc01129d1.pdf [file d1cc01129d1.pdf]

## Electronic Supplementary Information (ESI)

*for*

### **Two-Photon Fluorescence and MR Bio-imaging of Endogenous H<sub>2</sub>O<sub>2</sub> in Tumor Microenvironment by a Dual-Mode Nanoprobe**

Hongmei Zhong,<sup>a</sup> Shengrong Yu,<sup>\*, a, b</sup> Bingqian Li,<sup>a</sup> Kangdi He,<sup>a</sup> Dian Li,<sup>a</sup> Xiao  
Wang,<sup>\*, c</sup> and Yong-Xiang Wu<sup>\*, a, b</sup>

<sup>a</sup>*State Key Laboratory Base of Novel Functional Materials and Preparation Science, Key Laboratory of Advanced Mass Spectrometry and Molecular Analysis of Zhejiang Province, School of Materials Science and Chemical Engineering, Ningbo University, Ningbo, Zhejiang, 315211, China*

<sup>b</sup>*Institute of Mass Spectrometry, Ningbo University, Ningbo, 315211, China*

<sup>c</sup>*Immunology Innovation Team, School of Medicine, Ningbo University, Ningbo, Zhejiang, 315211, China*

\* Corresponding author:

Shengrong Yu

Email: yushengrong@nbu.edu.cn

Xiao Wang

Email: wangxiao@nbu.edu.cn

Yong-Xiang Wu

Email: wuyongxiang@nbu.edu.cn

## Table of Contents

|                                                                                                       |      |
|-------------------------------------------------------------------------------------------------------|------|
| 1. Reagents and Materials.....                                                                        | S-3  |
| 2. Apparatus.....                                                                                     | S-3  |
| 3. Synthetic procedure of TP-CQDs .....                                                               | S-3  |
| 4. Synthetic procedure of TP-CQDS@MnO <sub>2</sub> .....                                              | S-3  |
| 5. Synthetic procedure of MnO <sub>2</sub> Nanosheets .....                                           | S-3  |
| 6. Detection of H <sub>2</sub> O <sub>2</sub> .....                                                   | S-4  |
| 7. Response of TP-CQDs@MnO <sub>2</sub> as MRI Contrast Agents to H <sub>2</sub> O <sub>2</sub> ..... | S-4  |
| 8. Specificity Investigations .....                                                                   | S-4  |
| 9. Interference Detection.....                                                                        | S-4  |
| 10. Cell Culture.....                                                                                 | S-4  |
| 11. Cell Viability Assay .....                                                                        | S-5  |
| 12. OP and TP Fluorescence Imaging of MCF-7 cells .....                                               | S-5  |
| 13. Preparation of Liver Tissue Slices for OP and TP Fluorescence Imaging.....                        | S-5  |
| 14. MR Imaging of Intracellular different pH in living cells .....                                    | S-5  |
| 15. Quenching mechanism for the quenching of TP-CQDs by MnO <sub>2</sub> nanosheets .....             | S-6  |
| 16. Limit of detection concentration of H <sub>2</sub> O <sub>2</sub> .....                           | S-6  |
| 17. Supplementary Schemes and Figures.....                                                            | S-7  |
| 18. References .....                                                                                  | S-19 |

## 1. Reagents and Materials

The citric acid (Alfa Aesar) and branched poly(ethylenimine) (BPEI, M=1800) (Aladdin, Shanghai, China) were purchased for the preparation of TP-CQDs. Potassium permanganate ( $\text{KMnO}_4$ ) was purchased from Beijing Chemicals (Beijing, China). 2-(N-morpholino)ethanesulfonic acid (MES) was purchased from Shanghai Sangon Biological Engineering Technology & Services (Shanghai, China).  $\text{H}_2\text{O}_2$  stimulant phorbol-12-myristate-13-acetate (PMA) and  $\text{H}_2\text{O}_2$  scavenger N-acetyl-L-cysteine (NAC) were purchased from Beyotime Institute of Biotechnology (Shanghai, China). Fetal bovine serum (New Zealand Origine, Corning) was purchased from Sigma-Aldrich (Shanghai, China). Cell Counting Kit-8 (CCK-8) assay was purchased from Beijing Solarbio Science & Technology Co., Ltd. (Beijing, China). Ultrapure water was used throughout the whole experiments, which was purified by a Milli-Q reference system (Millipore, USA). All other reagents were of analytical grade (Aladdin, Shanghai China) and used without further purification.

## 2. Apparatus

FT-IR spectrophotometer (Thermo Nicolet 360) was used to attain the Fourier transform infrared (FT-IR) spectra. High-resolution transmission electron microscope (TEM, JEM-2100F, 200kV) was employed for the morphological characterization of the nanomaterials. RF-6000 fluorescence spectrophotometer (Shimadzu, Japan) was obtained for fluorescence spectrograms. Shimadzu UV-1800 spectrophotometer (Shimadzu, Japan) was acquired for absorbance measurements. The cell and tissue fluorescence images were recorded by a fluorescence microscope (Leica, Germany and Olympus, Japan). The measuring of longitudinal relaxation time ( $T_1$ ) was obtained by MesoMR23-060H-I NMR analyzing and imaging system (Suzhou Neimai Electronic Technology Co., LTD, Suzhou, China).

## 3. Synthetic procedure of TP-CQDs

The TP-CQDs were synthesized from the mixture of CA and BPEI by the reported pyrolysis method.<sup>1-4</sup>

## 4. Synthetic procedure of TP-CQDs@ $\text{MnO}_2$

TP-CQDs@ $\text{MnO}_2$  was synthesized by a one-pot procedure. Briefly, 250  $\mu\text{L}$  of MES buffer (0.1 M, pH 6.0) was respectively added to a 1.5 mL Eppendorf microtube (EP tube) containing the TP-CQDs solution (250.0  $\mu\text{L}$ , 375.0  $\mu\text{g}\cdot\text{mL}^{-1}$ ). Then adding 200.0  $\mu\text{L}$  10.0 mM  $\text{KMnO}_4$  into the EP tube filled with the above mixture. Next, the corresponding volume of deionized water was added to make the final volume of the mixture 1.0 mL. Ultrasound the resulting homogeneous mixed solution for 30 minutes until the solution turned brown. Subsequently, TP-CQDs@ $\text{MnO}_2$  were collected by centrifugation (12000 rpm) and washed three times with deionized water.

## 5. Synthetic procedure of $\text{MnO}_2$ Nanosheets

$\text{MnO}_2$  nanosheets were synthesized similar to TP-CQDs@ $\text{MnO}_2$  without TP-CQDs.

## 6. Detection of H<sub>2</sub>O<sub>2</sub>

Normally, stock solution was prepared by phosphate buffered saline solution (PBS, 150.0 mM, pH 5.0) and stored at room temperature, which containing different concentrations of H<sub>2</sub>O<sub>2</sub>. In the experiment of gradually releasing fluorescence signal in response to different concentrations of H<sub>2</sub>O<sub>2</sub>, the pre-prepared with different concentrations of acidic H<sub>2</sub>O<sub>2</sub> with adding the original prepared TP-CQDs@MnO<sub>2</sub> (375.0 μg·mL<sup>-1</sup>). The mixture was oscillated at room temperature and the fluorescence signal was detected by a fluorescence spectrophotometer, the excitation wavelength of TP-CQDs at 352.0 nm.

## 7. Response of TP-CQDs@MnO<sub>2</sub> as MRI Contrast Agents to H<sub>2</sub>O<sub>2</sub>.

The T<sub>1</sub>-weighted signals were detected for different concentrations of Mn<sup>2+</sup> of TP-CQDs@MnO<sub>2</sub>, which were treated with different concentrations of acidic H<sub>2</sub>O<sub>2</sub>. The Mn<sup>2+</sup> were measured at 0.5 T on a MesoMR23-060H-I. In detail, TP-CQDs@MnO<sub>2</sub> (3.0 mg·mL<sup>-1</sup>) was prepared in deionized water, the total (1.0 mL) consists of TP-CQDs@MnO<sub>2</sub> (63.0 μg·mL<sup>-1</sup>) with different concentrations of acidic H<sub>2</sub>O<sub>2</sub>. The mixture was incubated at room temperature for 0.5 h before the MR test.

## 8. Specificity Investigations

In order to assess the selectivity of the pro-prepared TP-CQDs@MnO<sub>2</sub> for acidic buffer solution, the selectivity of agents including the common metal cations (Ca<sup>2+</sup>, Mg<sup>2+</sup>, Mn<sup>2+</sup>, Zn<sup>2+</sup>, Fe<sup>3+</sup>), common anions (Cl<sup>-</sup>, ClO<sup>-</sup>, NO<sub>3</sub><sup>-</sup>, SO<sub>4</sub><sup>2-</sup>, CH<sub>3</sub>COO<sup>-</sup>, C<sub>6</sub>H<sub>5</sub>O<sub>7</sub><sup>3-</sup>, S<sub>2</sub>O<sub>8</sub><sup>2-</sup>), amino acids [L-cysteine (L-Cys), L-tryptophan (L-Try)], macromolecule (Glucose, GO), 10% FBS,<sup>5</sup> 100.0 μM glutathione (GSH),<sup>6</sup> 50.0 μM ascorbic acid (AA)<sup>6</sup> and 1.0 mM micromolecule (H<sub>2</sub>O<sub>2</sub>).

## 9. Interference Detection

To evaluate the interference of TP-CQDs@MnO<sub>2</sub> for acidic buffer solution containing H<sub>2</sub>O<sub>2</sub>, other interfering agents including the common metal cations (Ca<sup>2+</sup>, Mg<sup>2+</sup>, Mn<sup>2+</sup>, Zn<sup>2+</sup>, Fe<sup>3+</sup>), common anions (Cl<sup>-</sup>, ClO<sup>-</sup>, NO<sub>3</sub><sup>-</sup>, SO<sub>4</sub><sup>2-</sup>, CH<sub>3</sub>COO<sup>-</sup>, C<sub>6</sub>H<sub>5</sub>O<sub>7</sub><sup>3-</sup>, S<sub>2</sub>O<sub>8</sub><sup>2-</sup>), amino acids [L-cysteine (L-Cys), L-tryptophan (L-Try)], macromolecule (Glucose, GO), ascorbic acid (AA), 100.0 μM glutathione (GSH) and 10% FBS in 1.0 mM acidic H<sub>2</sub>O<sub>2</sub> that were studied under fluorescence modes.

## 10. Cell Culture

Immediately prior to the fluorescence imaging experiments, an amount of 0.4 mL of MCF-7 cells (8.0×10<sup>3</sup> mL<sup>-1</sup>) was seeded into a 24-well plate and allowed the adhesion in a 5.0% CO<sub>2</sub> incubator at 37.0 °C overnight. After that, the overnight culture medium was replaced by 0.4 mL of new culture medium which contained TP-CQDs@MnO<sub>2</sub> (375.0 μg·mL<sup>-1</sup>). After 3 h, the mixture medium was discarded and washed with dulbecco's phosphate-buffered Saline (DPBS) for three times, and then incubated with high K<sup>+</sup> buffer (30.0 mM NaCl, 120.0 mM KCl, 1.0 mM CaCl<sub>2</sub>, 0.5 mM MgSO<sub>4</sub>, 1.0 mM NaH<sub>2</sub>PO<sub>4</sub>, 5.0 mM glucose, 20.0 mM HEPES) with pH 5.0 buffer in the presence of 10.0 μM nigericin for 3 h at 37.0 °C for OP and TP

fluorescence imaging.

### **11. Cell Viability Assay**

MCF-7 cells were imaged by Leica TCS SP8 confocal laser scanning microscope with 63x oil objective and excited at 405.0 nm for OP images. And the TP images were obtained by TP electrophysiological microscope (Olympus FV1200 MPE) with 40x water objective and excited at 750.0 nm.

### **12. OP and TP Fluorescence Imaging of MCF-7 cells**

In vitro cytotoxicity of the nanoprobe TP-CQDs@MnO<sub>2</sub> was evaluated using Cell Counting Kit-8 (CCK-8) assay in MCF-7 cells. Briefly, 100.0 μL of cells ( $8.0 \times 10^3 \text{ mL}^{-1}$ ) were seeded into a 96-well plate and allowed the adhesion in a 5.0% CO<sub>2</sub> incubator at 37.0 °C. After that, the overnight culture medium was replaced by 100.0 μL of new culture medium which contained various concentrations of TP-CQDs@MnO<sub>2</sub> nanocomposite (0, 67.5, 125.0, 250.0, and 500.0 μg·mL<sup>-1</sup>) After the different concentrations of TP-CQDs@MnO<sub>2</sub> nanocomposite incubation for 24 h and 48 h, the mixed medium was replaced by 90.0 μL of new medium and 10.0 μL of CCK-8, which were incubated for another 4 h and then the absorbance at 450.0 nm were determined by an enzyme marker.

### **13. Preparation of Liver Tissue Slices for OP and TP Fluorescence Imaging**

Liver tissue was collected for OP and TP imaging. Liver slices were prepared from mouse liver, and the slices were cut into 600.0 mm thickness. After incubation with TP-CQDs@MnO<sub>2</sub> about three hours, and then reacted with different pH values buffer, the control group was treated with DPBS. The liver tissues were imaged by Leica TCS SP8 confocal laser scanning microscope with 20x water objective and excited at 405.0 nm for OP images. And the TP images were obtained by TP electrophysiological microscope (Olympus FV1200 MPE) with 20x water objective and excited at 750.0 nm.

### **14. MR Imaging of Intracellular different pH in living cells**

To explore the MR imaging of MCF-7 cells,  $5.0 \times 10^6$  cells were seeded into a 10 cm<sup>2</sup> cell culture dish with 10.0 mL medium, and allowed the adhesion in a 5.0% CO<sub>2</sub> incubator at 37.0 °C. After that, the overnight culture medium was replaced by 10.0 mL new culture medium contained with 375.0 μg·mL<sup>-1</sup> TP-CQDs@MnO<sub>2</sub>. After incubation for 3 h, the mixed medium was removed and DPBS was used for cleaning three times. Using Trypsin-EDTA (0.25%) to digest and then added 1.0 mL of medium to stop digestion. Cells that had been incubated with the probe were collected and centrifuged to remove the upper solution. Added 2.5 mL medium and made cells evenly distributed in the medium. Added 0.5 mL of above cells into each sterilized EP tube, then 0.5 mL different pH buffer solution were added and incubated in the culture. And then, the upper solution was removed by centrifugation. The last, added DPBS at constant volume (1.0 mL). The MR imaging of MCF-7 cells were obtained by MesoMR23-060H-I (23.4 MHZ, 0.5 T).

## 15. Quenching mechanism for the quenching of TP-CQDs by MnO<sub>2</sub> nanosheets

The modified Stern-Volmer equation  $F_0/(F_0 - F) = 1/f_a + 1/(K_{sv}[C])$  was used to deal with the fluorescence data and analysis the quenching mechanism of TP-CQDs by MnO<sub>2</sub> nanosheets.<sup>7</sup>

$F_0$ : The fluorescence intensity of TP-CQDs without quencher.

$F$ : The fluorescence intensity of TP-CQDs with different concentrations of quencher.

$f_a$ : The fraction of fluorescence quenching.

$K_{sv}$ : The Stern - Volmer quenching constant.

$[C]$ : The concentration of KMnO<sub>4</sub> (or MnO<sub>2</sub> nanosheets).

As shown in Fig. S10, there was a good linear relationship between  $F_0/(F_0 - F)$  and  $1/[C]$ , and the  $K_{sv}$  value ( $7.89 \times 10^3$  mol/L) could be obtained from the Stern-Volmer equation was  $y = 1.2678x + 0.1335$  ( $R^2 = 0.9901$ ).

The  $K_q$  represent dynamic fluorescence quenching rate constant, which reflects the effect of the inter-diffusion and inter-collision in the system on the decay rate of fluorescence molecular lifetime.  $K_q = K_{sv}/\tau_0$ ,  $\tau_0$  represent average fluorescent lifetime of fluorescence molecule without quencher. From fluorescence decay curve (Fig. S11), the average fluorescent lifetime of TP-CQDs was calculated 4.83 ns. And  $K_q = K_{sv}/\tau_0 = 7.89 \times 10^3 / (4.83 \times 10^{-9})$  mol·L<sup>-1</sup>·s<sup>-1</sup> =  $1.63 \times 10^{12}$  mol·L<sup>-1</sup>·s<sup>-1</sup>, that is far greater than  $2 \times 10^{10}$  mol·L<sup>-1</sup>·s<sup>-1</sup> (the maximum dynamic quenching constant).<sup>7</sup> Therefore, the fluorescence quenching of TP-CQDs was not only dynamic quenching, but also the static quenching process. And the static quenching was the main effect on the fluorescence quenching of the TP-CQDs by MnO<sub>2</sub> nanosheets.

## 16. Limit of detection concentration of H<sub>2</sub>O<sub>2</sub>

As shown in Fig. 1b, and the linear fitting equation was  $y = 521.2x + 4431.8$ ,  $R^2 = 0.987$ . And then, the LOD can be calculated. The calculation steps were as follows:

1.  $y = 521.2x + 4431.8$ ,  $R^2 = 0.987$

$k = 521.2$ ,  $\sigma = 26.7$  (Without H<sub>2</sub>O<sub>2</sub>, the mean standard deviation of fluorescence intensity of the nanoprobe TP-CQDs@MnO<sub>2</sub>.)

2.  $\log\text{LOD} = 3\sigma / k = 3 \times 26.7 / 521.2 = 0.1537$

3.  $\text{LOD} = 1.425$  pM

## 17. Supplementary Schemes and Figures

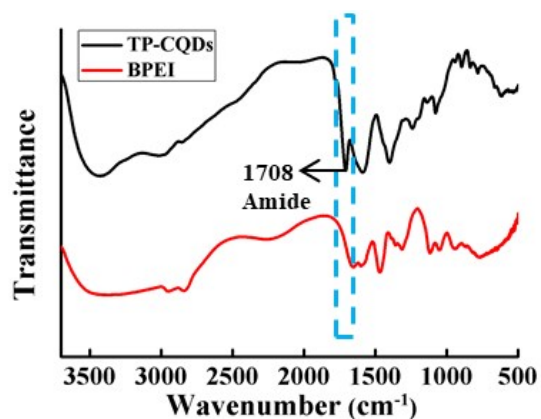

**Fig. S1.** Fourier Transform Infrared Spectrometer (FT-IR) spectrogram of TP-CQDs and BPEI.

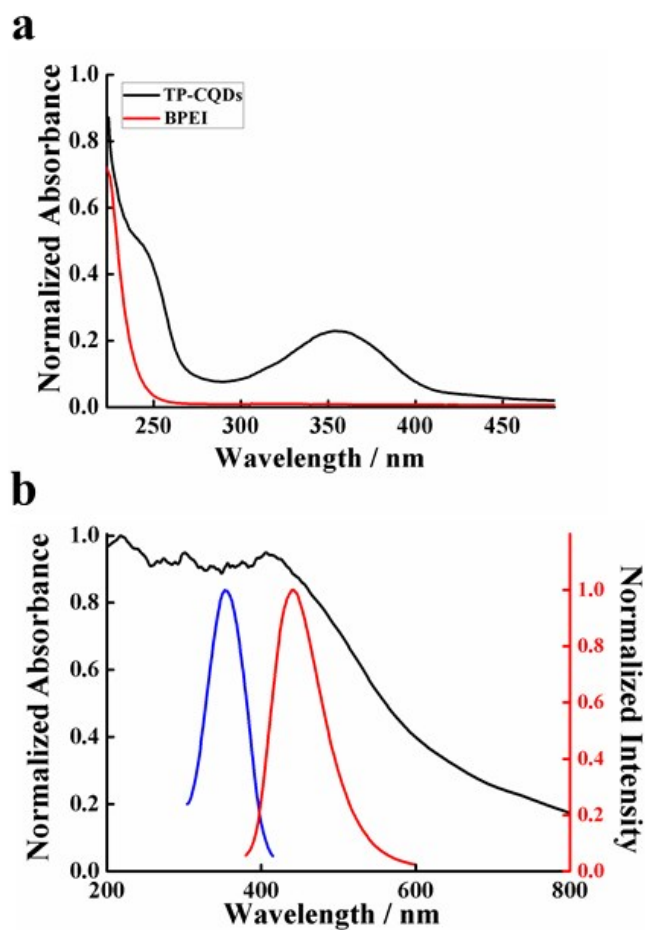

**Fig. S2.** (a) UV–Vis absorption spectra of TP-CQDs and BPEI. (b) UV–Vis absorption spectrogram of the MnO<sub>2</sub> nanosheets (black line), the fluorescence spectrogram of prepared TP-CQDs: the excitation (blue line) and emission (red line).

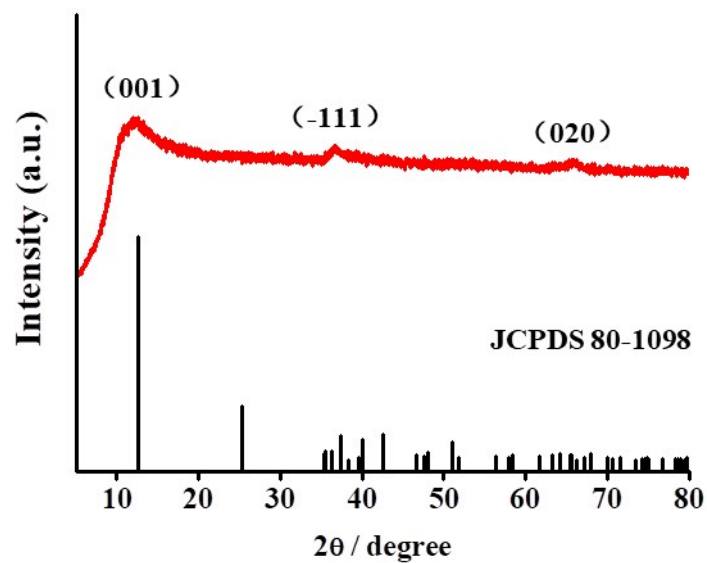

**Fig. S3.** X-ray powder diffraction (XRD) of MnO<sub>2</sub> nanosheets.

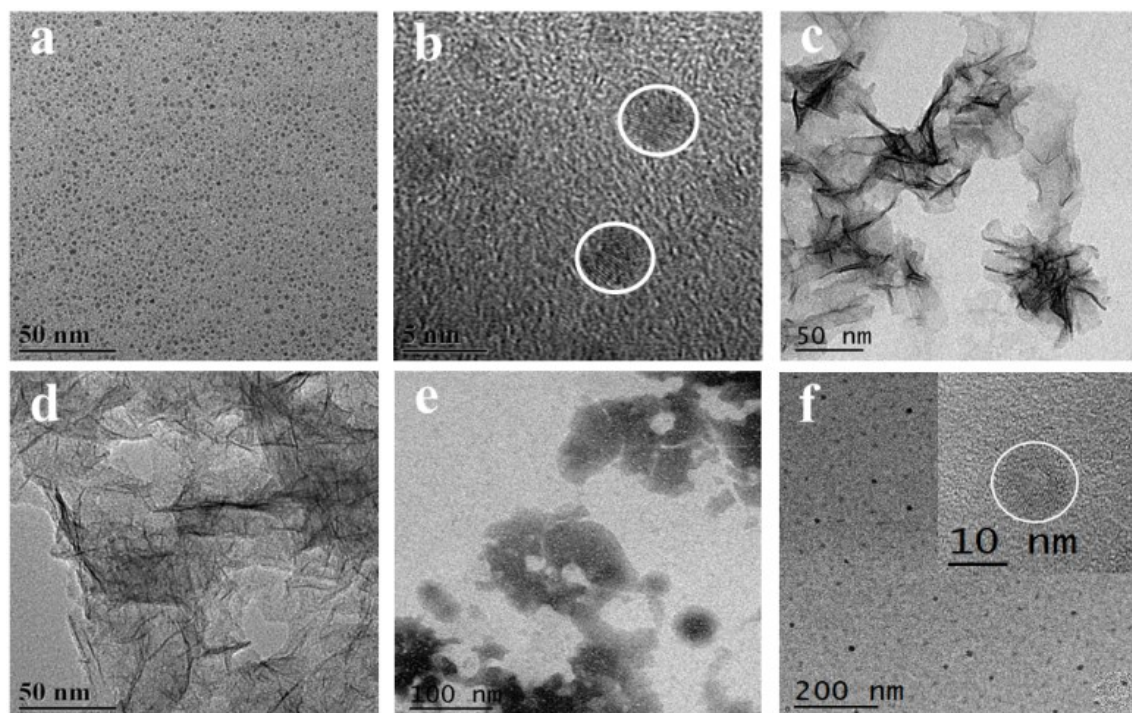

**Fig. S4.** TEM images of TP-CQDs, MnO<sub>2</sub> nanosheets and TP-CQDs@MnO<sub>2</sub>. TEM images of TP-CQDs (a, b), MnO<sub>2</sub> nanosheets (c), TP-CQDs@MnO<sub>2</sub> (d), TP-CQDs@MnO<sub>2</sub> reacted with acidic solution without (e) or with (f) H<sub>2</sub>O<sub>2</sub>.



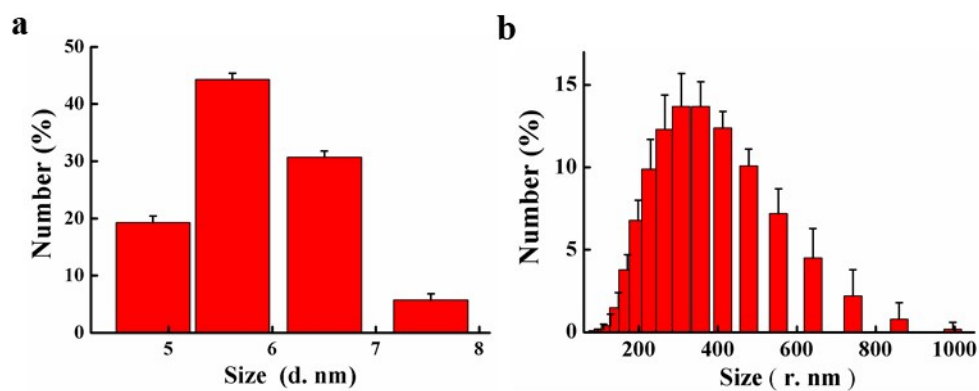

**Fig. S5.** Particle sizes distribution of TP-CQDs (a) and MnO<sub>2</sub> nanosheets (b) was determined based on dynamic light scattering.

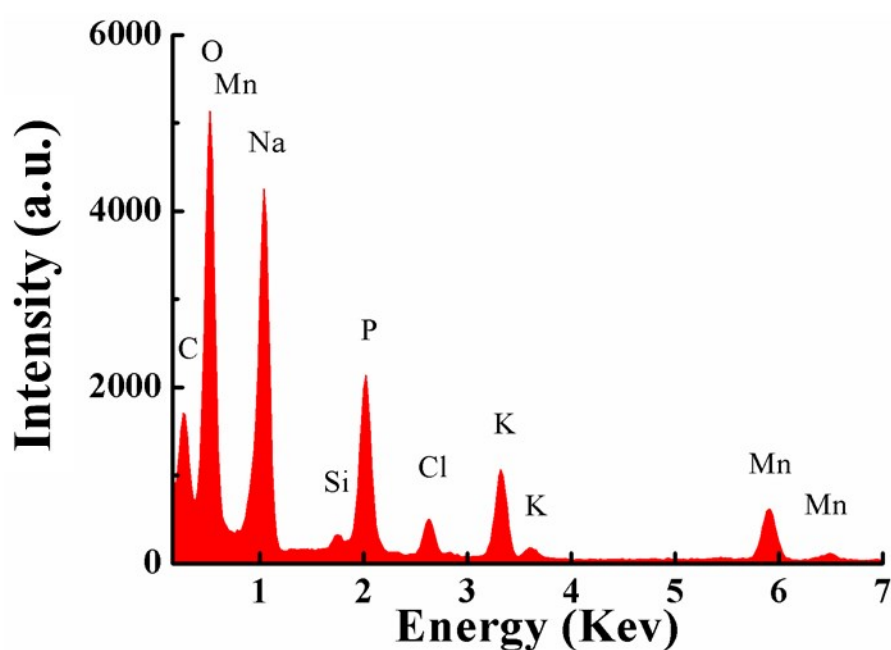

**Fig. S6.** Energy-dispersive X-ray (EDX) spectrogram of TP-CQDs@MnO<sub>2</sub>.

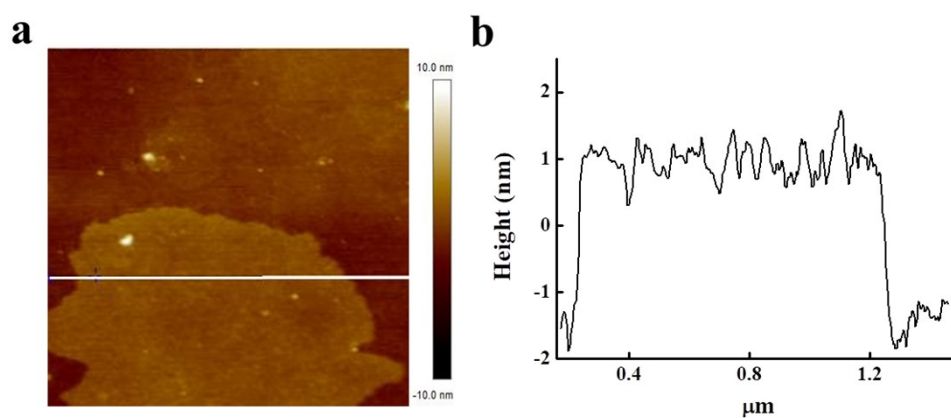

**Fig. S7.** Atomic force microscopy (AFM) of TP-CQDs@MnO<sub>2</sub>.

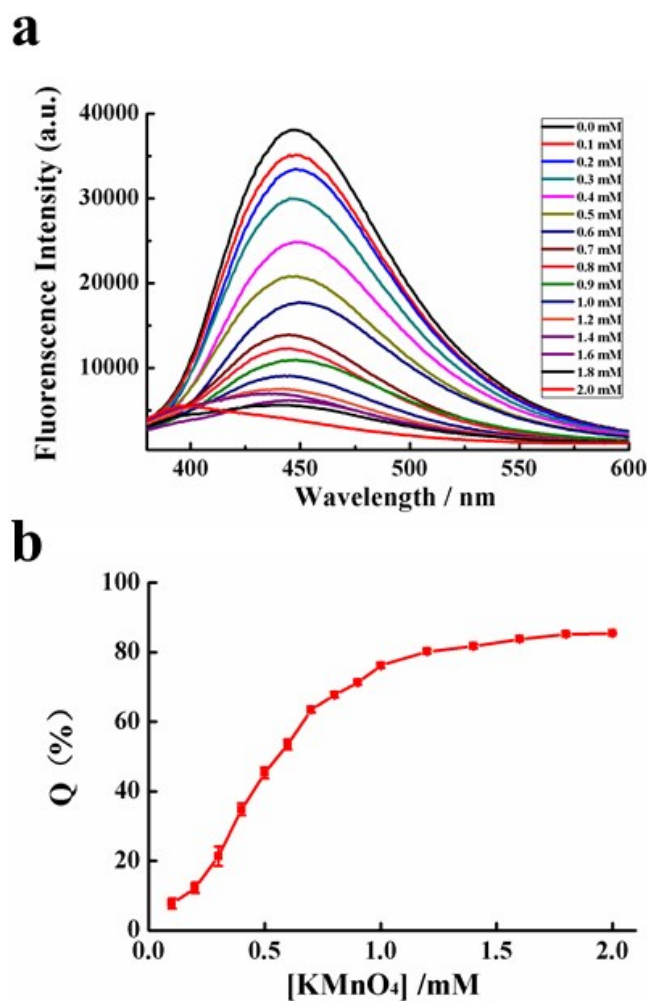

**Fig. S8.** (a) Fluorescence quenching experiment of TP-CQDs ( $12.45 \mu\text{g}\cdot\text{mL}^{-1}$ ) under different concentrations of  $\text{KMnO}_4$ . (b) Fluorescence quenching rate ( $Q$ ) versus different concentrations of  $\text{KMnO}_4$  (0-2.0 mM).

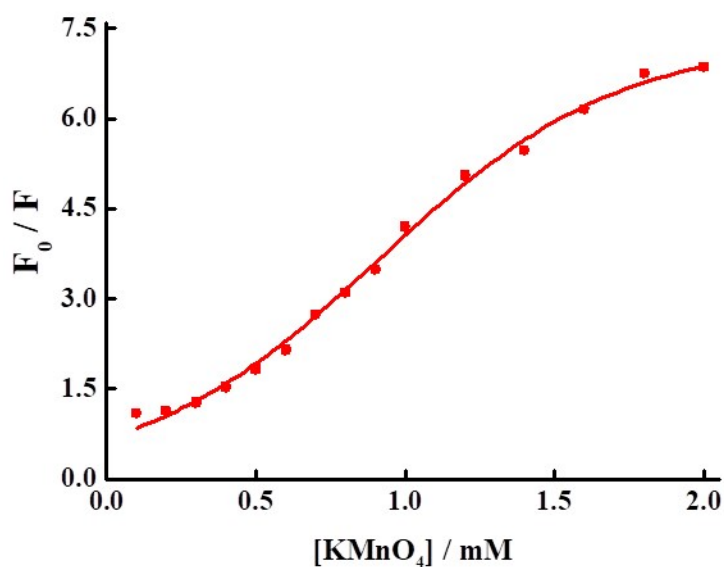

**Fig. S9.** Stern - Volmer plots of  $F_0/F$  versus  $[\text{KMnO}_4]$  in water solvent.

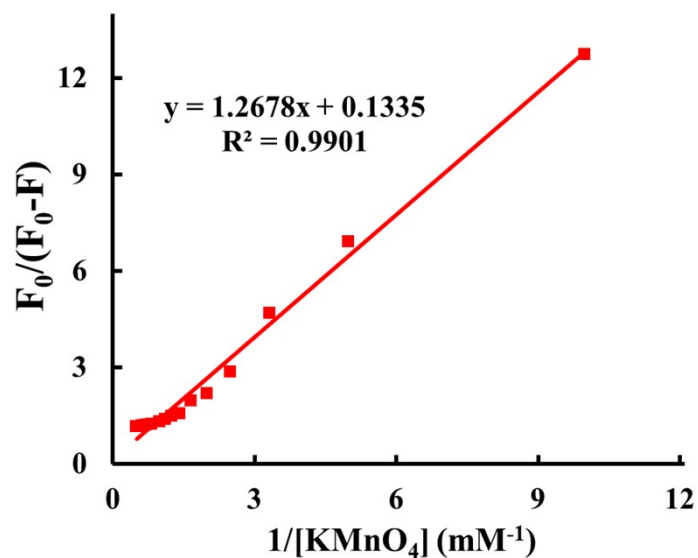

**Fig. S10.** Modified Stern - Volmer curve of  $F_0/(F_0 - F)$  versus the reciprocal of the concentration of  $KMnO_4$ .

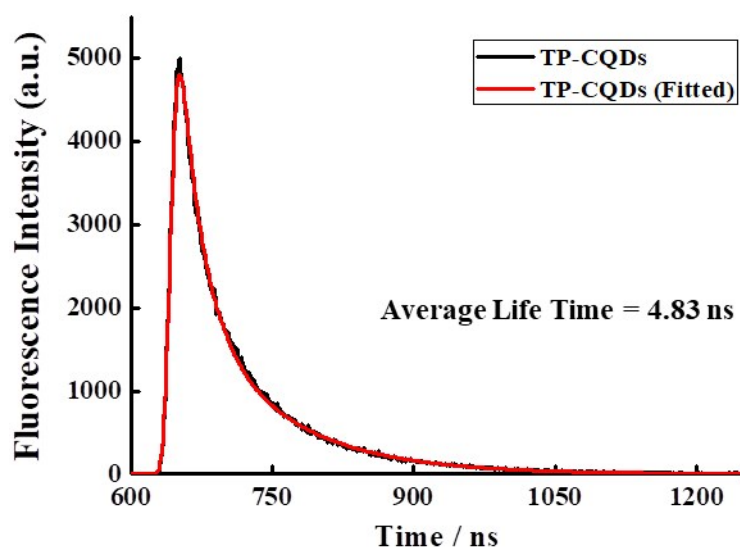

**Fig. S11.** Fluorescence intensity decay profile of TP-CQDs (black line), the fitted decay profile of TP-CQDs (red line).

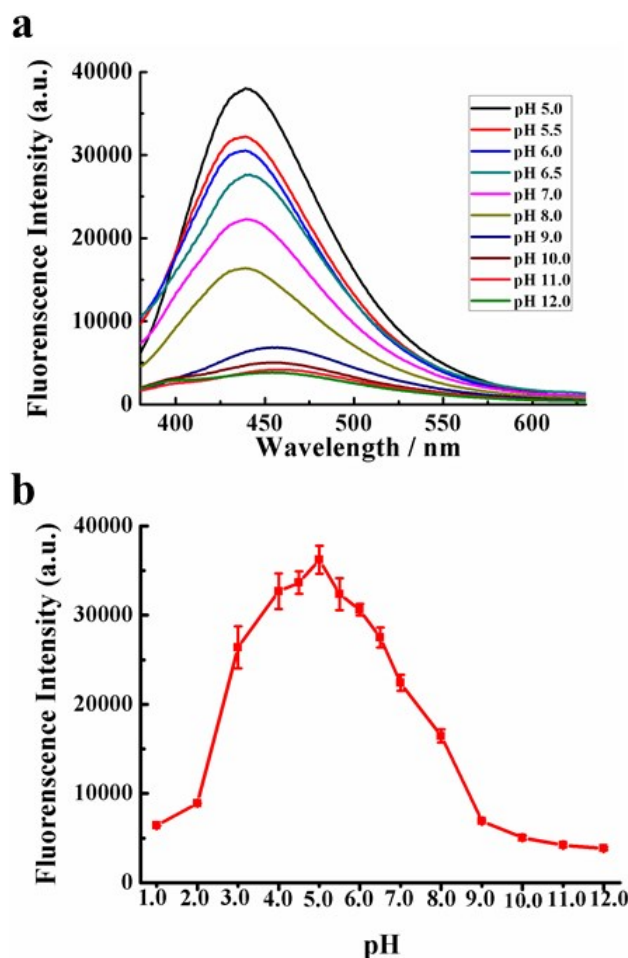

**Fig. S12.** (a) Fluorescence response of TP-CQDs@MnO<sub>2</sub> solution (375.0 μg·mL<sup>-1</sup>) with 1.0 mM H<sub>2</sub>O<sub>2</sub> under the different pH values from 5.0 to 12.0. (b) Fluorescence response curve of TP-CQDs@MnO<sub>2</sub> (375.0 μg·mL<sup>-1</sup>) solution under the different pHs from 1.0 to 12.0.

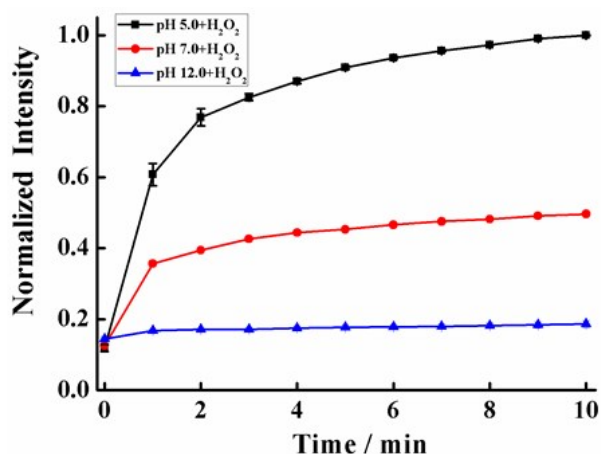

**Fig. S13.** Fluorescence recovery time curve of TP-CQDs@MnO<sub>2</sub> under different pH values (5.0, 7.0 and 12.0) with H<sub>2</sub>O<sub>2</sub>.

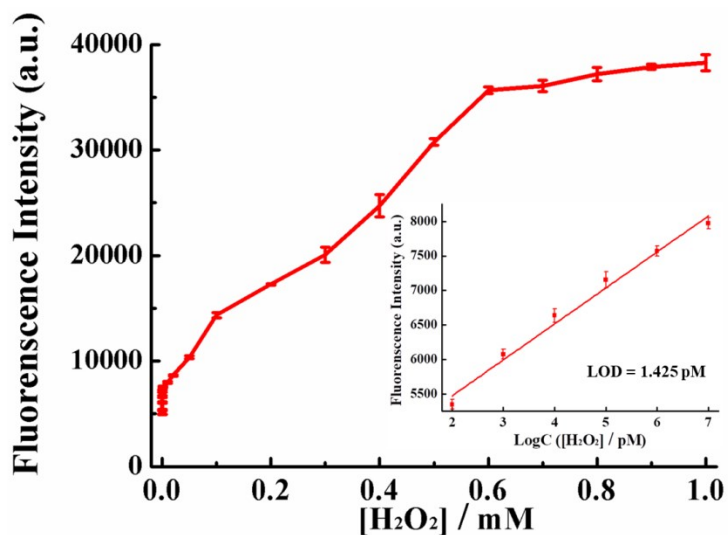

**Fig. S14.** Fluorescence sensing titration curve of TP-CQDs@MnO<sub>2</sub> solution (375.0 μg•mL<sup>-1</sup>) contained different concentrations of H<sub>2</sub>O<sub>2</sub> under acid condition.

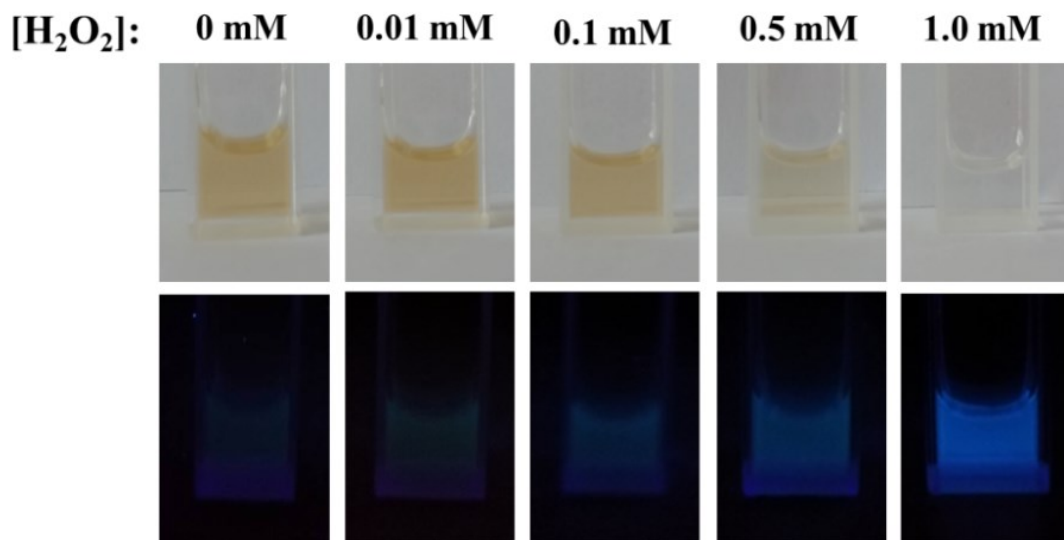

**Fig. S15.** The digital and ultraviolet photograph of TP-CQDs@MnO<sub>2</sub> (375.0 μg•mL<sup>-1</sup>) reacted with different concentrations of H<sub>2</sub>O<sub>2</sub> under acidic PBS buffer solution.

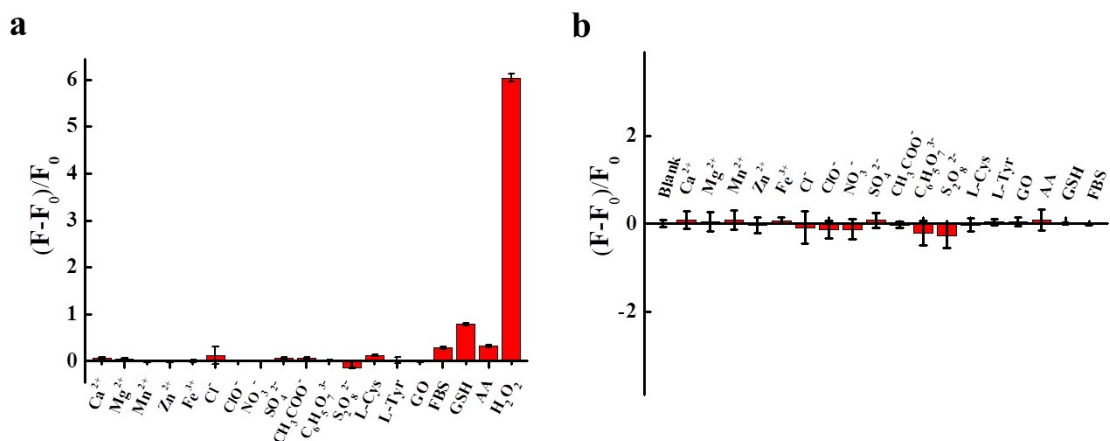

**Fig. S16.** (a) The selectivity of fluorescence responses of TP-CQDs@MnO<sub>2</sub> to 1.0 mM of Ca<sup>2+</sup>, Mg<sup>2+</sup>, 200.0 μM of Mn<sup>2+</sup>, Zn<sup>2+</sup>, Fe<sup>3+</sup>, 250.0 μM of Cl<sup>-</sup>, ClO<sup>-</sup>, NO<sub>3</sub><sup>-</sup>, SO<sub>4</sub><sup>2-</sup>, CH<sub>3</sub>COO<sup>-</sup>, C<sub>6</sub>H<sub>5</sub>O<sub>7</sub><sup>3-</sup>, S<sub>2</sub>O<sub>8</sub><sup>2-</sup>, amino acids [L-cysteine (L-Cys), L-tryptophan (L-Try)], macromolecule (Glucose, GO), 10% FBS, 100.0 μM glutathione (GSH), 50.0 μM ascorbic acid (AA) and 1.0 mM H<sub>2</sub>O<sub>2</sub> in acidic buffer. (b) The interference of fluorescence responses of TP-CQDs@MnO<sub>2</sub> to 1.0 mM of Ca<sup>2+</sup>, Mg<sup>2+</sup>, 200.0 μM of Mn<sup>2+</sup>, Zn<sup>2+</sup>, Fe<sup>3+</sup>, 250.0 μM of Cl<sup>-</sup>, ClO<sup>-</sup>, NO<sub>3</sub><sup>-</sup>, SO<sub>4</sub><sup>2-</sup>, CH<sub>3</sub>COO<sup>-</sup>, C<sub>6</sub>H<sub>5</sub>O<sub>7</sub><sup>3-</sup>, S<sub>2</sub>O<sub>8</sub><sup>2-</sup>, amino acids [L-cysteine (L-Cys), L-tryptophan (L-Try)], Glucose (GO), ascorbic acid (AA), 100.0 μM glutathione (GSH) and 10% FBS in 1.0 mM acidic H<sub>2</sub>O<sub>2</sub>.  $\lambda_{\text{ex}}=352.0$  nm.

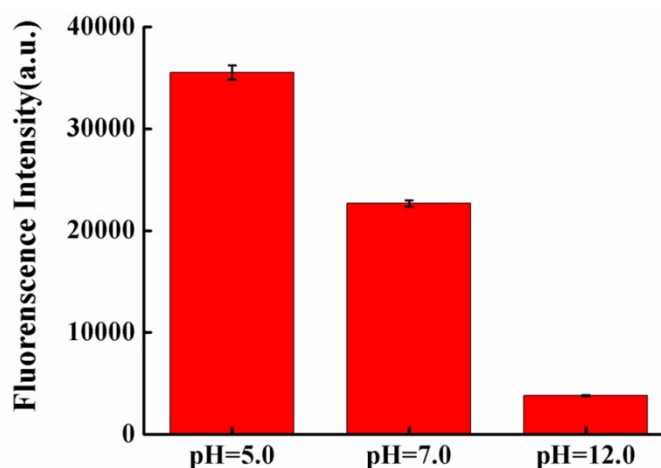

**Fig. S17.** The PBS buffer solutions with 1.0 mM H<sub>2</sub>O<sub>2</sub> under different pH values of PBS buffer solution was prepared from Yongjiang River to explore the stability of TP-CQDs@MnO<sub>2</sub> (375.0 μg•mL<sup>-1</sup>) in complex environments.

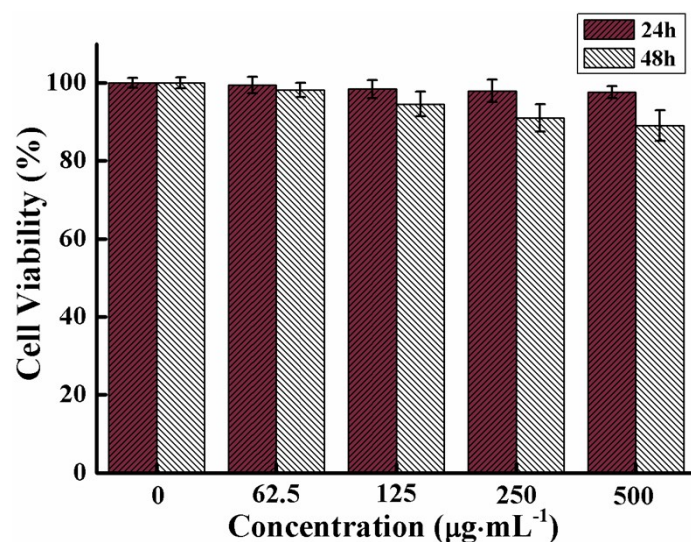

**Fig. S18.** Cell viability of MCF-7 cells after being incubated with different concentrations of TP-CQDs@MnO<sub>2</sub> for 24 h and 48 h.

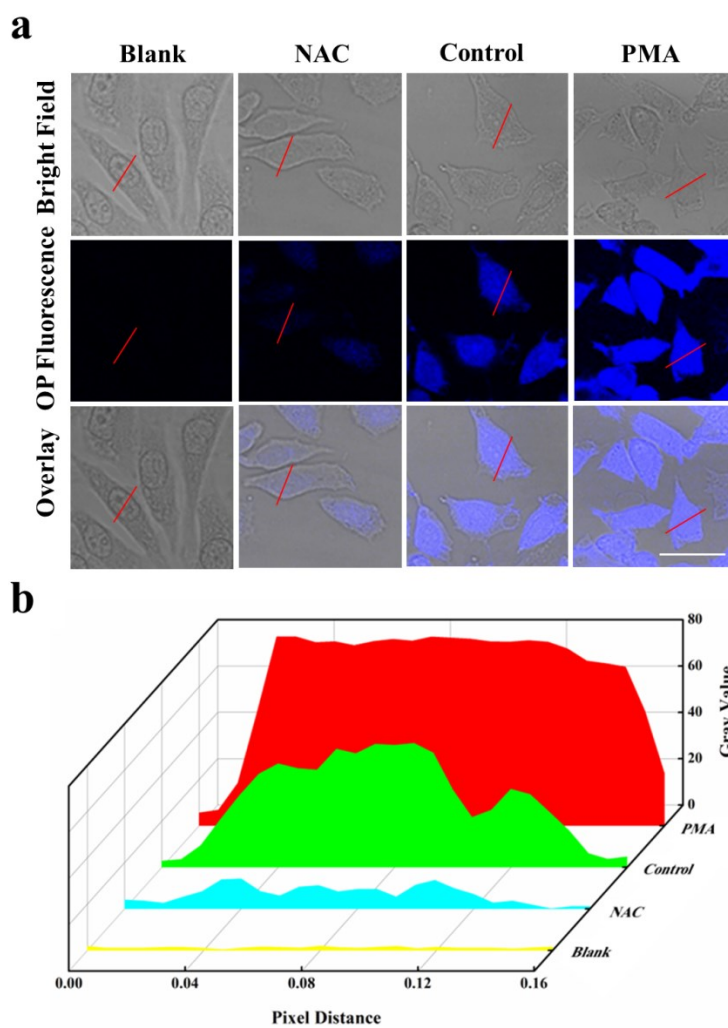

**Fig. S19.** (a) OP fluorescence imaging of MCF-7 cells were incubated with TP-CQDs@MnO<sub>2</sub> ( $375.0 \mu\text{g}\cdot\text{mL}^{-1}$ ) for endogenous H<sub>2</sub>O<sub>2</sub>. (b) Grey value of fluorescence intensity of (a). The scale bar is 20.0  $\mu\text{m}$ .

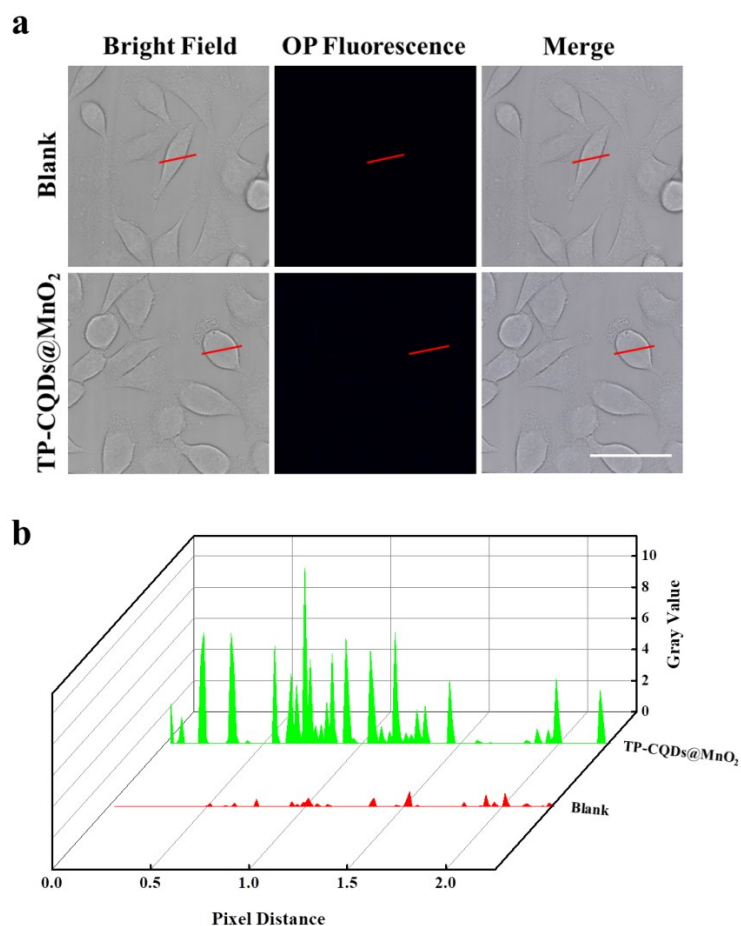

**Fig. S20.** (a) OP fluorescence images of HEK293T cells were incubated without or with TP-CQDs@MnO<sub>2</sub> (375.0  $\mu\text{g}\cdot\text{mL}^{-1}$ ) for endogenous H<sub>2</sub>O<sub>2</sub>. (b) Grey value of fluorescence intensity of (a). The scale bar is 20.0  $\mu\text{m}$ .

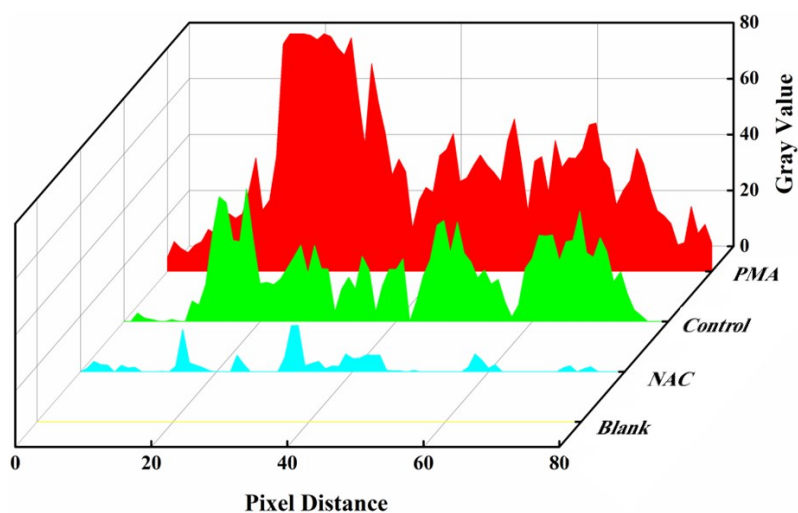

**Fig. S21.** Grey value of fluorescence intensity of TP fluorescence imaging (Fig. 3, red line) for endogenous H<sub>2</sub>O<sub>2</sub> of MCF-7 cells with TP-CQDs@MnO<sub>2</sub> (375.0  $\mu\text{g}\cdot\text{mL}^{-1}$ ).



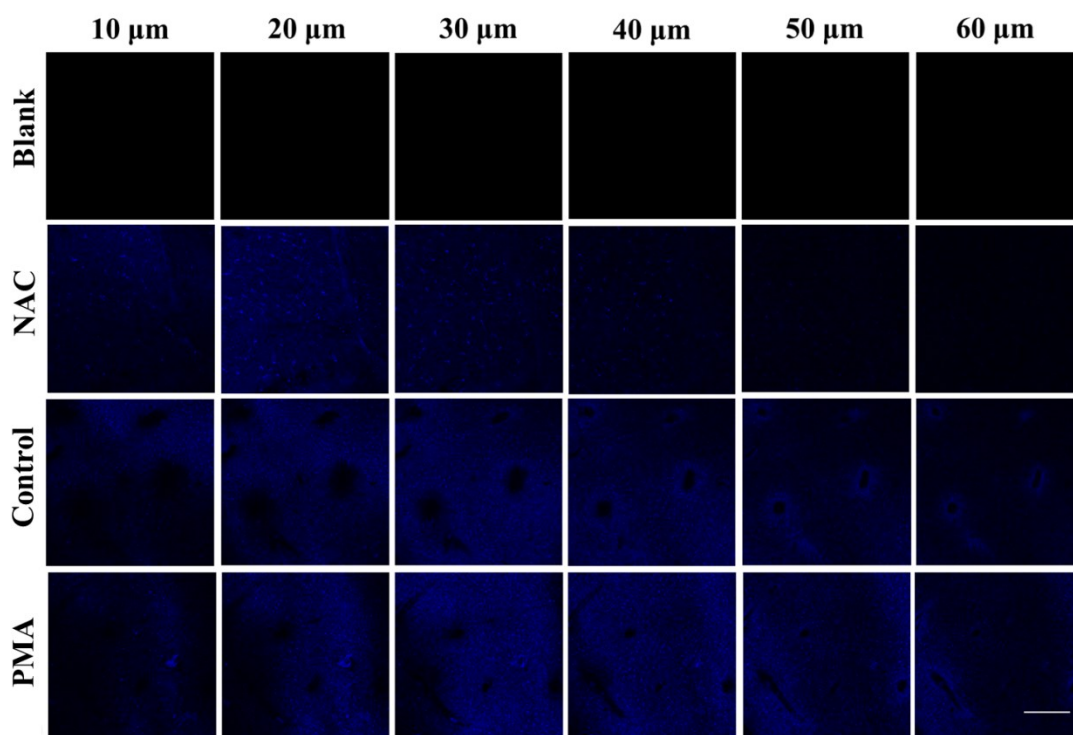

**Fig. S22.** OP fluorescence imaging of liver tissue slices with TP-CQDs@MnO<sub>2</sub> (375.0  $\mu\text{g}\cdot\text{mL}^{-1}$ ). The scale bar is 200.0  $\mu\text{m}$ .

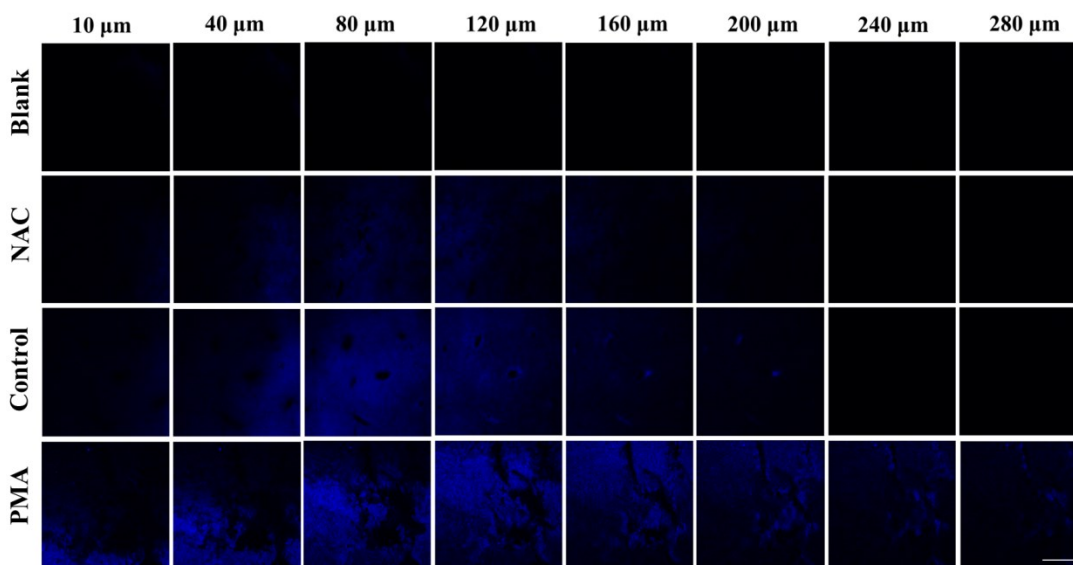

**Fig. S23.** TP fluorescence imaging of liver tissue slices with TP-CQDs@MnO<sub>2</sub> (375.0  $\mu\text{g}\cdot\text{mL}^{-1}$ ). The scale bar is 200.0  $\mu\text{m}$ .

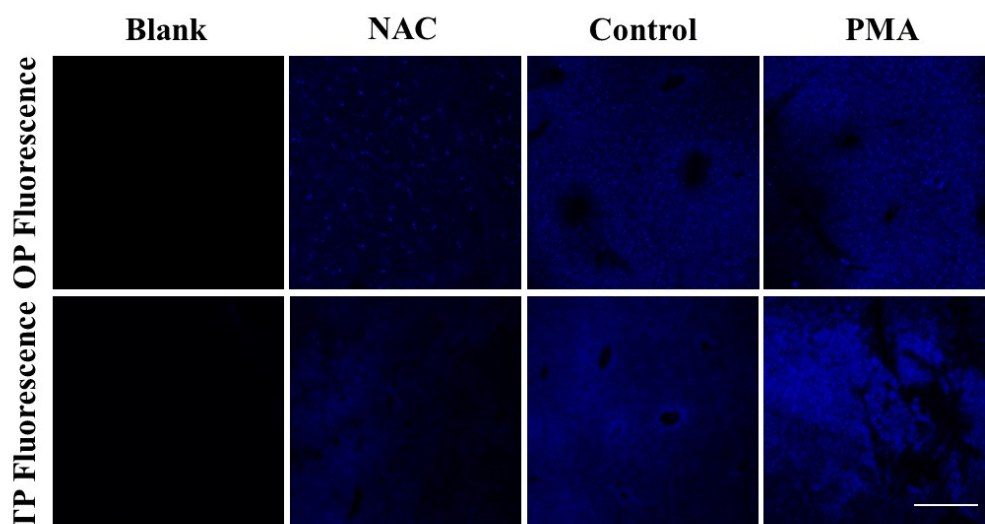

**Fig. S24.** OP fluorescence (30.0  $\mu\text{m}$ ) and TP fluorescence (110.0  $\mu\text{m}$ ) imaging of liver tissue slices with TP-CQDs@MnO<sub>2</sub> (375.0  $\mu\text{g}\cdot\text{mL}^{-1}$ ). The scale bar is 200.0  $\mu\text{m}$ .

## 18. References

1. X. Lin, G. Gao, L. Zheng, Y. Chi and G. Chen, *Anal. Chem.* 2014, **86**, 1223-1228.
2. Y. Dong, R. Wang, G. Li, C. Chen, Y. Chi and G. Chen, *Anal. Chem.* 2012, **84**, 6220-6224.
3. Y. Dong, R. Wang, H. Li, J. Shao, Y. Chi, X. Lin and G. Chen, *Carbon*. 2012, **50**, 2810-2815.
4. W. Zou, Q. Zhao, J. Zhang, X. Chen, X. Wang, L. Zhao, S. Chen and Y. Wang, *Analytica Chimica Acta*. 2017, **970**, 64-72.
5. W. Tang, W. Fan, W. Zhang, Z. Yang, L. Li, Z. Wang, Y. Chiang, Y. Liu, L. Deng, L. He, Z. Shen, O. Jacobson, M. A. Aronova, A. Jin, J. Xie, and X. Chen. *Adv. Mater.* 2019, **31**, 1900401-19004010.
6. M. I. Halawa, F. Wu, M. N. Zafar, I. M. Mostafa, A. Abdussalam, S. Han and G. Xu. *J. Mater. Chem. B*. 2020, **8**, 3542-3549.
7. J. Zhang, L. Na, Y. Jiang, D. Han, D. Lou, L. Jin. *Food Chemistry*. 2017, **221**, 803-808.
